# Supplementary material for: In Vitro Investigations on Optimizing and Nebulization of IVT-mRNA Formulations for Potential Pulmonary-Based Alpha-1-Antitrypsin Deficiency Treatment
Source: MDPI journal article supplement (doi:10.3390/pharmaceutics13081281), 2021-08-17
Supplement: s1 [file s1]

# Supplementary Materials: In Vitro Investigations on Optimizing and Nebulization of IVT-mRNA Formulations for Potential Pulmonary-Based Alpha-1-Antitrypsin Deficiency Treatment

Shan Guan, Max Darmstädter, Chuanfei Xu and Joseph Rosenecker

## This File Includes:

Supplementary Table S1  
Supplementary Figure S1 to S3

## Supplementary Table

**Table S1.** Size of IVT-mRNA/Lipofectamine2000 lipoplexes using Protocol 2.

| Amounts of Lipofectamine2000 (μL) | Amounts of IVT-mRNA (μL) | Size (nm) Non-nebulized | Size (nm) Nebulized |
|-----------------------------------|--------------------------|-------------------------|---------------------|
| 7.2                               | 18.0                     | 564±73                  | 798±102             |
| 10.8                              | 18.0                     | 748±165                 | 820±195             |
| 14.4                              | 18.0                     | 804±203                 | 840±130             |

The complexes were prepared in OptiMEM. After a 10 minute incubation period the size measurement was performed. The data represent hydrodynamic diameter±SD, n=3.

## Supplementary Figures

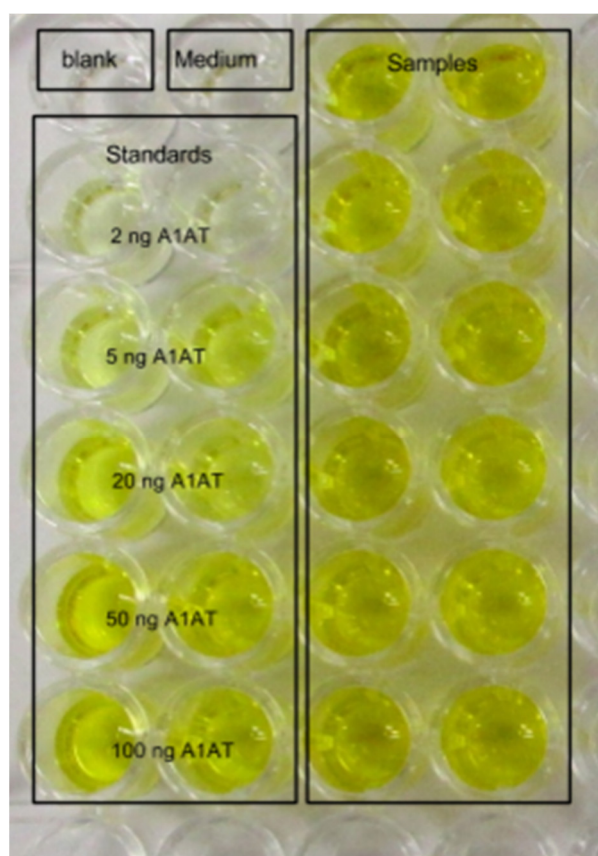

**Figure 1S.** A representative ELISA microplate of A1AT-mRNA/Lipofectamine2000 complexes mediated transfection. 24 h after transfection, 16HBE cell culture supernatants were collected and

centrifuged at  $3000 \times g$  for 10 minutes to remove debris. 50  $\mu$ l of each sample was pipetted into an ELISA plate. 2 ng, 5 ng, 20 ng, 50 ng and 100 ng of A1AT-standards were used.

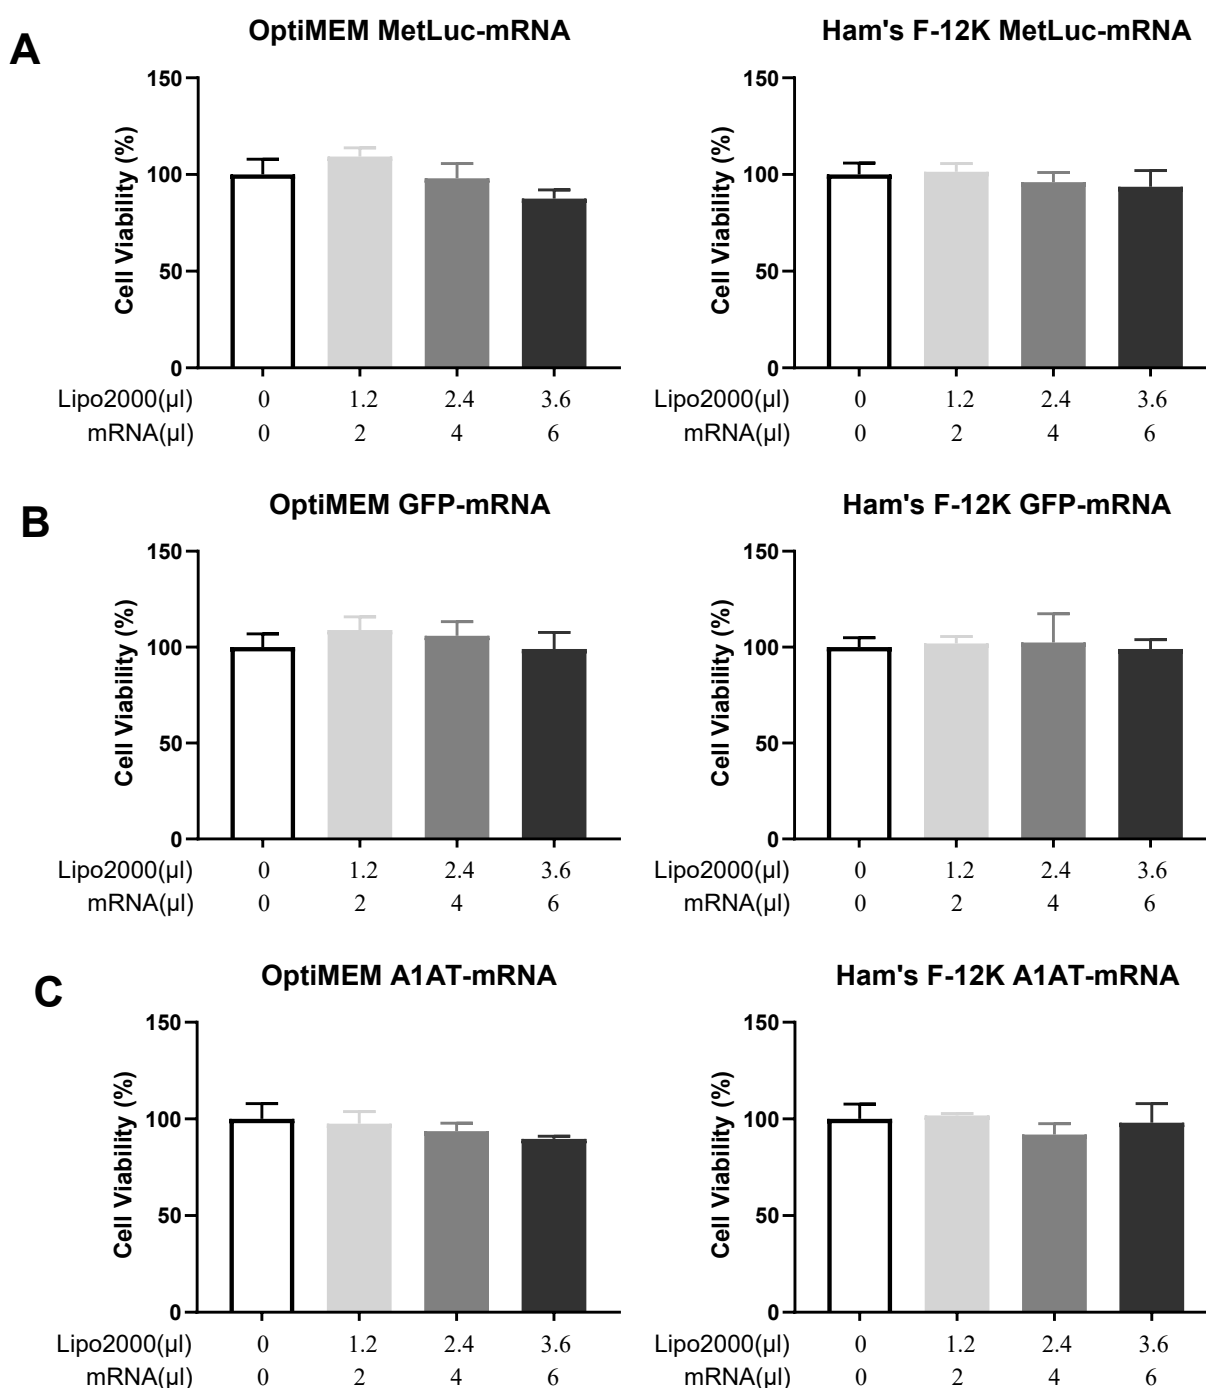

**Figure S2.** Cytotoxicity profile of IVT-mRNA/Lipofectamine2000 complexes towards 16HBE cells. The complexes were prepared in OptiMEM or Ham's F-12K medium by mixing indicated amounts of Lipofectamine2000 with MetLuc-mRNA (A) or GFP-mRNA (B) or A1AT-mRNA (C) at the concentration of 0.1  $\mu$ g/ $\mu$ l, respectively. The complexes were incubated with 16HBE cells for 2 h. Cell viability was assayed 24 h after transfection via an MTT assay, untreated cells were used as a control (100%), n=6. "Lipo2000" represents Lipofectamine2000 and "mRNA" represents MetLuc-mRNA (A) or GFP-mRNA (B) or A1AT-mRNA (C).

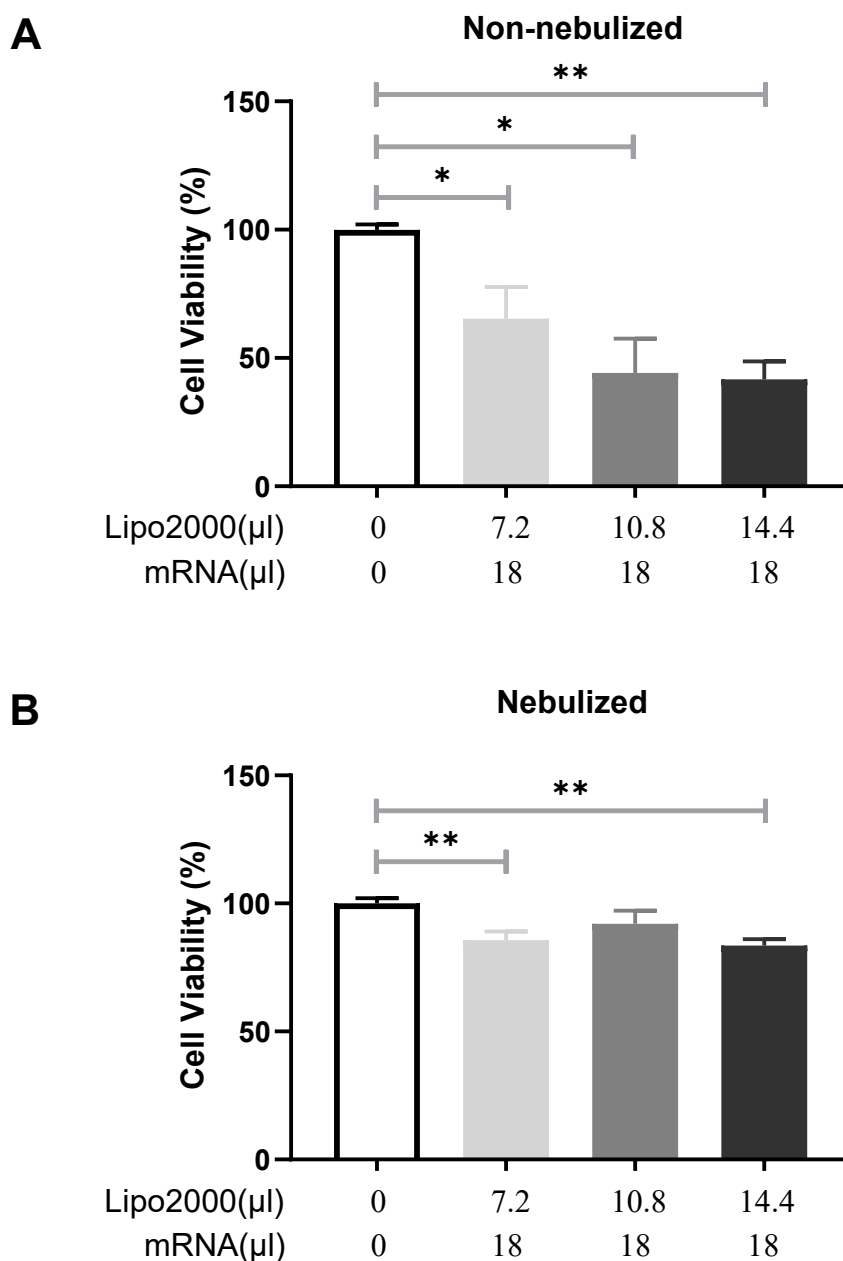

**Figure 3.** Cytotoxicity profile of MetLuc-mRNA/Lipofectamine2000 complexes prepared by Protocol 2 using Ham's F-12K medium towards 16HBE cells. 7.2  $\mu$ l, 10.8  $\mu$ l and 14.4  $\mu$ l Lipofectamine2000 was mixed with 18  $\mu$ l MetLuc-mRNA. "Lipo2000" represents Lipofectamine2000 and "mRNA" represents MetLuc-mRNA. A fraction of the complexes was kept separately and used as a "non-nebulized" sample (A). The rest of the solution was aerosolized for 5 minutes using a PARI Boy® jet-nebulizer and the collected part was used as a "nebulized" formulation (B). The complexes were incubated with 16HBE cells for 2 h. Cell viability was assayed 24 h after transfection. Untreated cells were used as 100%, n=6. The results were analysed for the statistical significance with a two-tailed unpaired student's t-test: \* p < 0.05 and \*\* p < 0.01.
